# Supplementary material for: Highly efficient Mo2C nanotubes as a counter electrode catalyst for organic redox shuttles in dye-sensitized solar cells
Source: Royal Society of Chemistry journal article supplement (doi:10.1039/c4cc01426j), 2014-01-01
Supplement: c4cc01426j1.pdf [file c4cc01426j1.pdf]

## Supplementary Information

### Highly efficient Mo<sub>2</sub>C nanotubes as a counter electrode catalyst for organic redox shuttles in dye-sensitized solar cells

Mingxing Wu,<sup>\*a</sup> Ya-nan Lin,<sup>a</sup> Hongyue Guo,<sup>a</sup> Kezhong Wu,<sup>\*a</sup> and Xiao Lin,<sup>\*b</sup>

<sup>a</sup>College of Chemistry and Material Science, Key Laboratory of Inorganic Nano-materials of Hebei Province, Hebei Normal University, No. 20 Rd. East of 2nd Ring South, Yuhua District, Shijiazhuang City, Hebei Province, 050024, P. R. China

E-mail: [mingxing@mail.ustc.edu.cn](mailto:mingxing@mail.ustc.edu.cn); Tel. & Fax: 86-311-80787438

<sup>b</sup>Shanghai Institute of Applied Physics, Chinese Academy of Sciences  
Jialuo Road 2019, Shanghai, 201800, P.R. China

**Synthesis of Mo<sub>2</sub>C particles (Mo<sub>2</sub>C-Ps):** 2.73 g of MoCl<sub>5</sub> was added to 8 mL ethanol under stirring for 30 min to form Mo-orthoester. Next, 3.00 g of urea was added to the obtained Mo-orthoester solution and stirred until the urea was completely dissolved. Subsequently, the viscous solution was dried at 120 °C to get rid of the residual solvent and got the urea-metal precursor. After sintered urea-metal precursor at 800 °C for 4 h under N<sub>2</sub> atmosphere, Mo<sub>2</sub>C particles were collected.

**Synthesis of Mo<sub>2</sub>C nanotubes (Mo<sub>2</sub>C-NTs):** 2.48 g of (NH<sub>4</sub>)<sub>6</sub>Mo<sub>7</sub>O<sub>24</sub>·4H<sub>2</sub>O was dissolved in 40 mL of deionized water under stirring followed by adding 3.34 g of phenylamine. The pH of the above solution was around 10. Adding hydrochloric acid (1 M) drop by drop to regulate the pH to 4~5, until white amounts of floccules appeared. Keep the solution under 50 °C for 6 h and collected the white wirelike precursor (Fig. S1). After sintered at 750 °C or 1000 °C for 3.5 h under N<sub>2</sub> atmosphere, Mo<sub>2</sub>C nanotubes with different diameter were achieved. Fig. S2 showed the XRD patterns of the prepared Mo<sub>2</sub>C-NTs at 750 and 1000 °C. The diffraction peaks at 34.42, 37.64, 39.48, 52.06, 61.94, 69.34, 72.54, 74.86, 75.76, and 81.28 ° can be assigned to the crystal planes of (100), (002), (101), (102), (110), (103), (200) (112), (201), and (004), respectively for Mo<sub>2</sub>C (No. 11-0680, PDF-2 Database). At 750 °C, the diffraction peak showed a low intensity, indicating a weak crystallinity. In

contrast, the Mo<sub>2</sub>C nanotubes synthesized at 1000 ° gave a high crystallinity. Fig. 3S and 4S showed the SEM image of the prepared Mo<sub>2</sub>C-NTs at different sinter temperature. The diameter of the Mo<sub>2</sub>C-NTs at 750 °C was around 25 nm, a slight aggregation was observed. However, under the high sinter temperature of 1000 °C the thin Mo<sub>2</sub>C-NTs aggregated to form thick nanotubes, and the diameter was increased to 350~500 nm.

**Cell Fabrication:** The Mo<sub>2</sub>C counter electrode (CE) was prepared with spray coating technique. In detail, 100 mg of the Mo<sub>2</sub>C nanotubes (or particles) were dispersed in 5 mL of isopropanol, ultrasonically dispersed for 30 min, and the Mo<sub>2</sub>C-NTs paste was achieved. The prepared paste was then sprayed onto FTO glass. Subsequently, the FTO glass coated with Mo<sub>2</sub>C-NTs paste was sintered under N<sub>2</sub> atmosphere at 450 °C for 30 min and the Mo<sub>2</sub>C-NTs CE was obtained. The thickness of Mo<sub>2</sub>C film was controlled around 20 μm. The Pt CE on FTO glass was fabricated by thermal decomposition as follows: isopropanol solution containing 0.5 wt% chloroplatinic acid was sprayed on FTO conductive glass for 5 s. The resulting conductive glass was sintered at 450 °C for 30 min, and the Pt CE was obtained. 10 μm thick layer of TiO<sub>2</sub> sensitized with N719 dye (Solaronix) was used as the photoanode. The T<sup>-</sup>/T<sub>2</sub> electrolyte contains 0.4 M Me<sub>4</sub>N<sup>+</sup>T<sup>-</sup>, 0.4 M di-5-(1-methyltetrazole) disulfide (T<sub>2</sub>), 0.05 M LiClO<sub>4</sub>, and 0.5 M TBP in 6:4 (v/v) acetonitrile/ethylene carbonate. The DSC was assembled with a photoanode, a CE, and an electrolyte. The active area of the DSC was 0.16 cm<sup>2</sup>. Symmetrical cells were fabricated with two identical counter electrodes clipping the electrolyte. The cells were sealed with a hot-melt surlyn film.

**Measurements:** The as-prepared Mo<sub>2</sub>C particles and nanotubes were assessed by X-ray diffraction (XRD) measurements using an automatic X-ray powder diffractometer (D/Max 2400, Rigaku). The morphologies of Mo<sub>2</sub>C were characterized by scanning electron microscopy (SEM, S-4800, Hitachi, Japan) and transmission electron microscopy (TEM, h-7650, Hitachi, Japan). Nitrogen adsorption-desorption isotherms were measured with an Antosorb-1 Apparatus (Antosorb-1, Quantachrome, USA) to check the BET surface area of Mo<sub>2</sub>C nanotubes and particles. The current density–voltage performance of the DSC was carried out under simulated AM 1.5

illumination ( $I = 100 \text{ mW cm}^{-2}$ , PEC-L01, Peccell, Yokohama, Japan) with an electrochemical workstation system (CHI 660E, Chenhua, Shanghai). EIS experiments were characterized with symmetrical cells in the dark with a computer-controlled potentiostat (Zennium Zahner, Kronach, Germany). The measured frequency ranged from 100 mHz to 1 MHz. The amplitude of the alternating current was set at 10 mV. Tafel-polarization measurements were carried out with the electrochemical workstation system (CHI 660E, Chenhua, Shanghai) in a symmetrical dummy cell. The scan rate was  $10 \text{ mV s}^{-1}$ . CV measurements were carried out in a three electrode system in an argon-purged electrolyte solution at a scan rate of  $20 \text{ mV s}^{-1}$  using the electrochemical workstation system (CHI 660E, Chenhua, Shanghai). Pt served as the counter electrode, and Ag/AgCl worked as the reference electrode. The  $\text{T}^-/\text{T}_2$  electrolyte in CV measurements contained 100 mM  $\text{Me}_4\text{N}^+\text{T}^-$ , 10 mM  $\text{T}_2$ , and 0.2 M  $\text{LiClO}_4$  in acetonitrile.

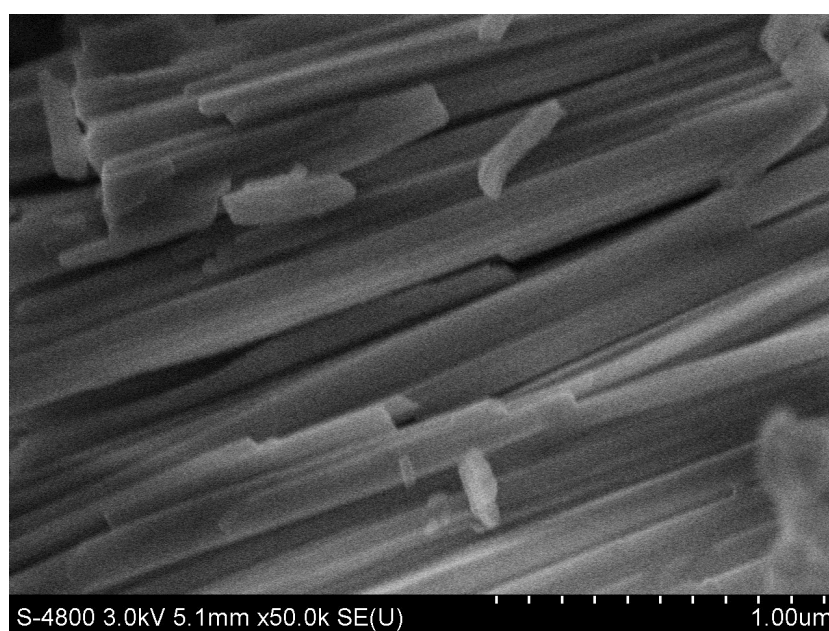

**Fig. S1.** SEM image of the wirelike precursor of the  $\text{Mo}_2\text{C-NTs}$ .

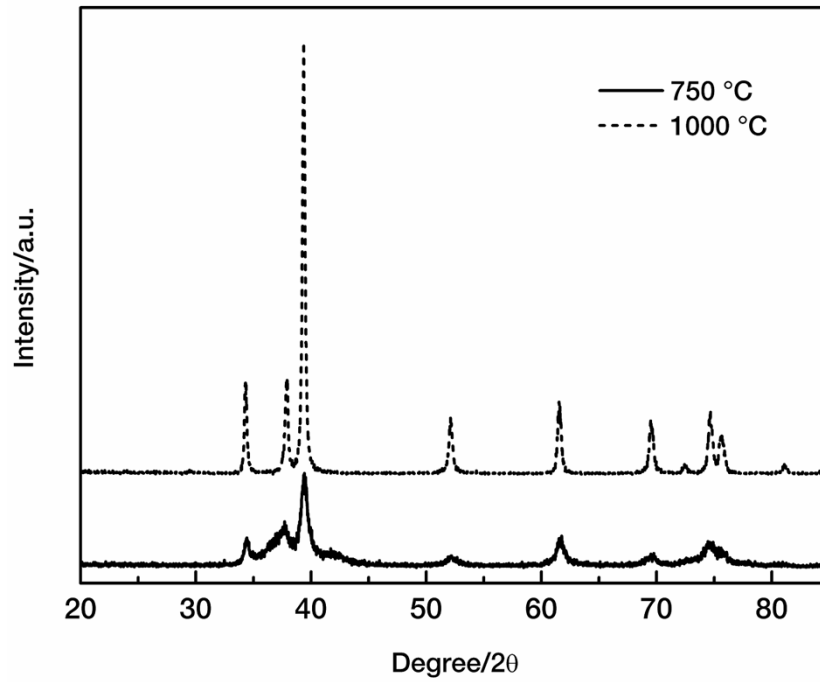

**Fig. S2.** XRD patterns of the prepared Mo<sub>2</sub>C-NTs at different sinter temperature.

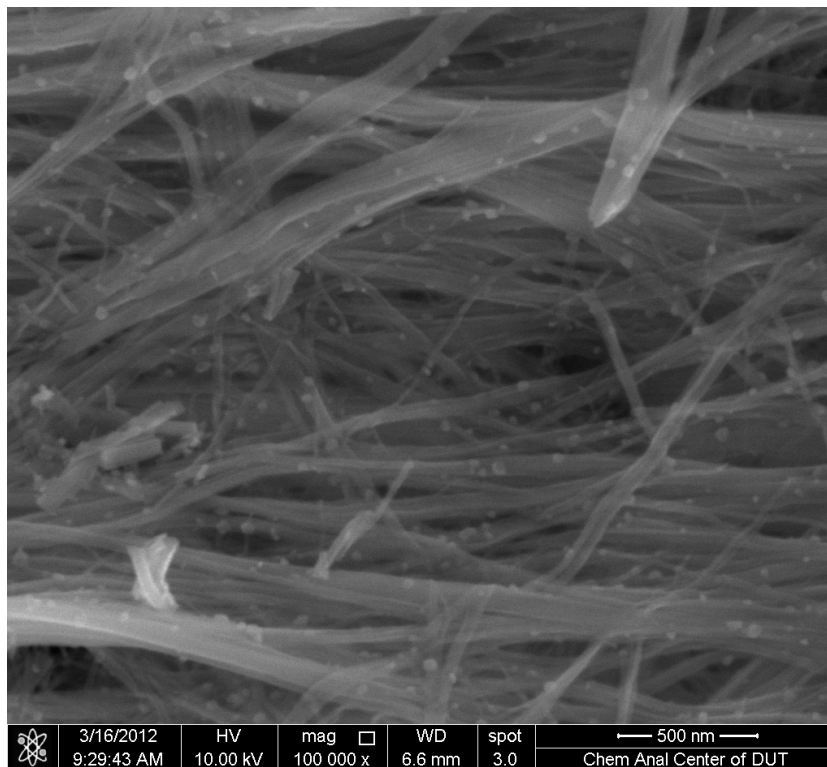

**Fig. S3.** SEM image of the Mo<sub>2</sub>C-NTs sintered at 750 °C.

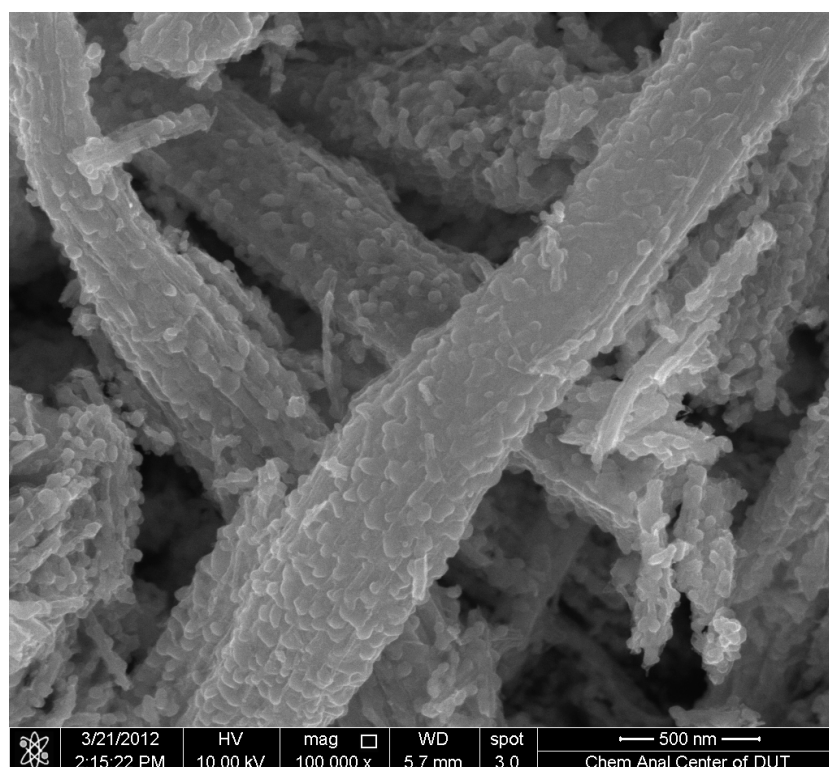

**Fig. S4.** SEM image of the Mo<sub>2</sub>C-NTs sintered at 1000 °C

**Table S1** Photovoltaic parameters of the T<sup>-</sup>/T<sub>2</sub> electrolyte based DSC and EIS parameters of the symmetrical cells using different electrodes.

| Counter electrodes    | $V_{oc}/mV$ | $J_{sc}/mA\ cm^{-2}$ | $FF$  | PCE/% | $R_s/\Omega$ | $R_{ct}/\Omega$ | $Z_N/\Omega$ |
|-----------------------|-------------|----------------------|-------|-------|--------------|-----------------|--------------|
| Pt                    | 625         | 13.05                | 0.479 | 3.91  | 12.8         | 8.1             | 23.2         |
| Mo <sub>2</sub> C-Ps  | 636         | 13.66                | 0.633 | 5.50  | 12.9         | 2.0             | 16.7         |
| Mo <sub>2</sub> C-NTs | 637         | 14.06                | 0.694 | 6.22  | 13.2         | 0.8             | 4.5          |

$V_{oc}$ : open-circuit voltage,  $J_{sc}$ : short-circuit current density,  $FF$ : fill factor, PCE: power conversion efficiency  $R_s$ : series resistance,  $R_{ct}$ : charge transfer resistance,  $Z_N$ : Nernst diffusion impedance.
